# Supplementary material for: High metabolic load distance in professional soccer according to competitive level and playing positions
Source: PeerJ journal article supplement (doi:10.7717/peerj.13318), 2022-09-20
Supplement: English-language_codebook.pdf [file English-language_codebook.pdf]

## ENGLISH-LANGUAGE CODEBOOK

**ID:** Identifying of individual match observations

**PlayerPosition:** playing position of soccer players. 1 = Central Backs (CB); 2 = Full Backs (FB); 3 = Center Midfields (CM); 4 = Wide Midfields (WM); 5 = Forwards (FW)

**IdPlayer:** Identifying of soccer players

**IdTeam:** Identifying of soccer teams

**League:** Identifying of soccer standard leagues. 1 = First Spanish Division; 2 = Second Spanish Division

**PlayingTime1:** Playing time of soccer players (in minutes) in the first half

**PlayingTime2:** Playing time of soccer players (in minutes) in the second half

**PlayingTotalTime:** Playing time of soccer players (in minutes) in the entire match

**HMLD\_m\_First.half:** High Metabolic Load Distance covered by soccer players (in meters) in the first half

**HMLD\_m\_Second.half:** High Metabolic Load Distance covered by soccer players (in meters) in the second half

**HMLD\_m\_Session:** High Metabolic Load Distance covered by soccer players (in meters) in the entire match

**HMLD\_m\_First.half\_min:** High Metabolic Load Distance covered by soccer players per minute (in meters) in the first half

**HMLD\_m\_Second.half\_min:** High Metabolic Load Distance covered by soccer players per minute (in meters) in the second half

**HMLD\_m\_Session\_min:** High Metabolic Load Distance covered by soccer players per minute (in meters) in the entire match
